# Supplementary material for: The Child Mental Health Treatment Gap in an Urban Low-Income Setting: Multisectoral Service Use and Correlates
Source: Atypon-hosted journal article supplement (doi:10.1176/appi.ps.202000742), 2021-06-09
Supplement: appi.ps.202000742.ds001.pdf [file appi.ps.202000742.ds001.pdf]

Figure S1

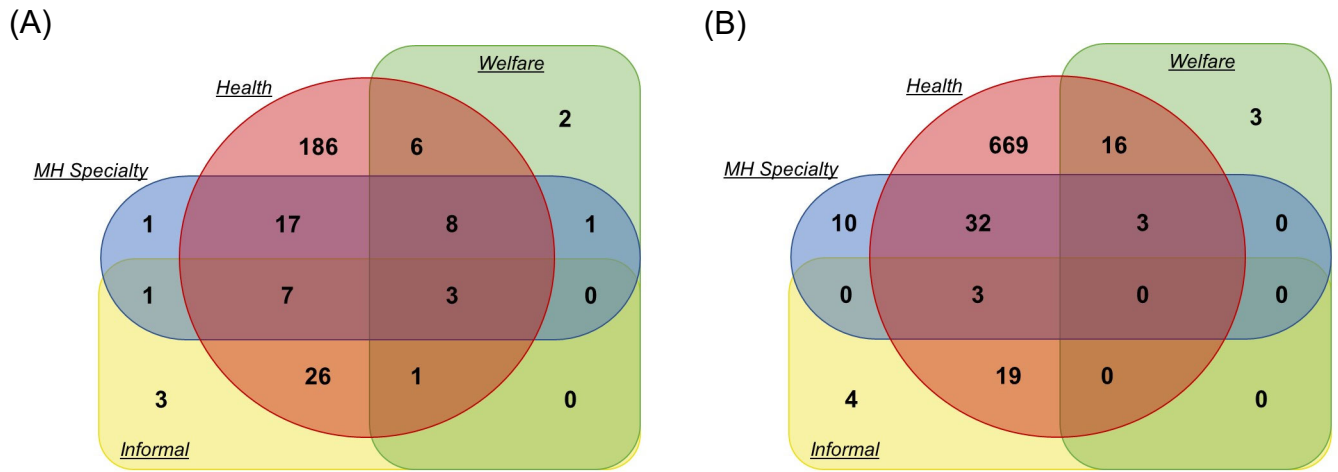

**Table S1** Combinations of services used in children with and without mental health problems

|                                     | Children w/MH problems <sup>a</sup> |                      |           | Children w/out MH problems |                      |           | p <sup>d</sup>     |
|-------------------------------------|-------------------------------------|----------------------|-----------|----------------------------|----------------------|-----------|--------------------|
|                                     | N                                   | Percent <sup>c</sup> | 95% CI    | N                          | Percent <sup>c</sup> | 95% CI    |                    |
| Total N                             | 316                                 | 22.4                 |           | 1092                       | 77.6                 |           |                    |
| Only MH                             | 1                                   | 0.7                  | 0.1-4.9   | 10                         | 0.9                  | 0.4-1.8   | 0.799              |
| Only Health                         | 186                                 | 59.6                 | 52.3-66.6 | 669                        | 63.2                 | 57.8-68.2 | 0.052              |
| Only Other <sup>b</sup>             | 38                                  | 11.3                 | 7.3-17.1  | 42                         | 3.7                  | 2.5-5.6   | <0.001             |
| MH & Health (with or without other) | 35                                  | 11.4                 | 8.0-16.1  | 38                         | 3.2                  | 2.2-4.5   | <0.001             |
| MH & Other (excludes Health)        | 2                                   | 0.4                  | 0.1-1.5   | 0                          | 0.0                  | 0.0       | 0.002 <sup>e</sup> |
| None (reference)                    | 54                                  | 16.6                 | 11.7-23.0 | 333                        | 29.0                 | 24.5-33.9 | --                 |
| Only 1 sector                       | 192                                 | 61.3                 | 53.9-68.2 | 686                        | 64.8                 | 59.7-69.6 | 0.049              |
| 2 sectors                           | 51                                  | 14.9                 | 10.9-19.9 | 67                         | 5.5                  | 4.2-7.3   | <0.001             |
| 3 or 4 sectors                      | 19                                  | 7.3                  | 4.3-12.1  | 6                          | 0.6                  | 0.3-1.5   | <0.001             |
| None (reference)                    | 54                                  | 16.6                 | 11.7-23.0 | 333                        | 29.0                 | 24.5-33.9 | --                 |

MH = mental health.

<sup>a</sup> Any broad-band or narrow-band CBCL scale with T-scores in the clinical range.

<sup>b</sup> Welfare and/or informal sectors.

<sup>c</sup> Weighted percentages.

<sup>d</sup> p values for chi-square tests.

<sup>e</sup> Based on adjusted F (variant of second-order Rao-Scott chi-square) and its degree of freedom.

**Supplemental Table 2 – Study Sampling Design and Ethics Approvals**

|                  |                                                                                                                                                                                                                                                                                                                                                                                                                                                                                                                                                                                                                                         |
|------------------|-----------------------------------------------------------------------------------------------------------------------------------------------------------------------------------------------------------------------------------------------------------------------------------------------------------------------------------------------------------------------------------------------------------------------------------------------------------------------------------------------------------------------------------------------------------------------------------------------------------------------------------------|
| Sampling Design  | <p>The study used a three-stage sampling procedure that included 1) a random sample of census units using the method probability proportional to the size, 2) a random sample of eligible households, and 3) a target child randomly selected among all age-eligible children residing with their biological, step or adoptive mother in each participant household. Data were collected in participants' households by trained lay interviewers who applied structured questionnaires to mothers (response rate 88% of 1,605). The present study focuses on participants with no missing data on mental health problems (N=1,408).</p> |
| Ethics approvals | <p>The Brazilian National Health Council – National Research Ethics Commission (#25000.182992/2011-76) and the Research Ethics Committee of Universidade Federal de São Paulo (#0324/11) approved the study.</p>                                                                                                                                                                                                                                                                                                                                                                                                                        |

|  |                                                                       |
|--|-----------------------------------------------------------------------|
|  | Written informed consent was obtained from all participating mothers. |
|--|-----------------------------------------------------------------------|
